# Supplementary material for: A Purified Recombinant Lipopeptide as Adjuvant for Cancer Immunotherapy
Source: Hindawi journal article supplement (doi:10.1155/2014/349783), 2014-01-01
Supplement: f1 [file 349783.f1.pdf]

Figure S1

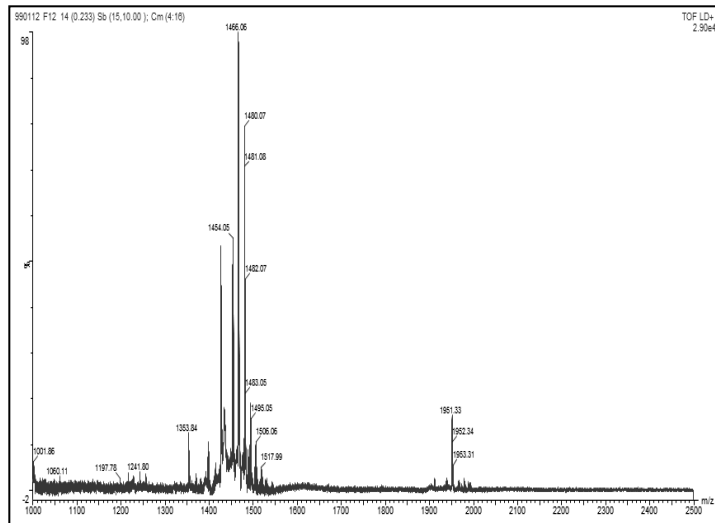

(a)

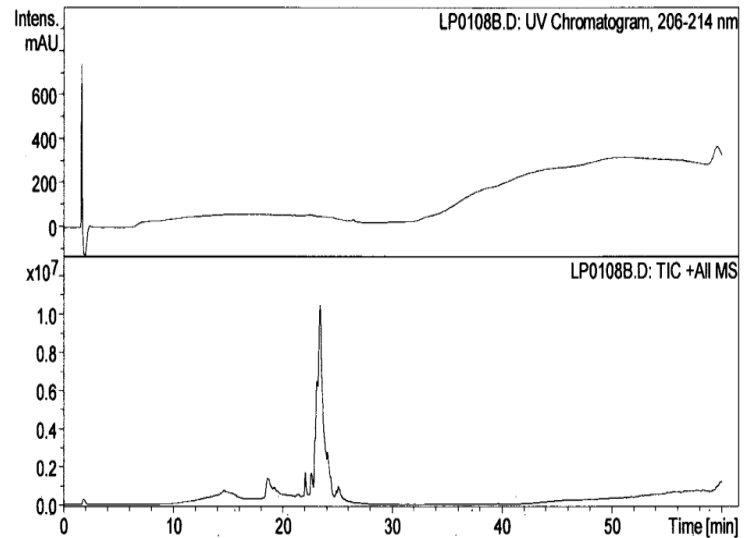

(b)

**Supplemental Figure 1.** (a) The lipo-Nter was obtained after digesting the rlipo-D1E3 using trypsin and was analyzed on a Waters® MALDI micro MX™ mass spectrometer. The major peaks with  $m/z$  around 1466 are the tri-acylpeptide. The sequences are the lipid moieties with CSQEAK. The peaks with  $m/z$  around 1951 are the tri-acylpeptide. The sequences are the lipid moieties with CSQEAKQEVK. The peaks of di-acylpeptides are in  $M/Z$  around 1228. No obvious peaks of di-acylpeptide were observed. (b) When checking the purity of lipo-Nter, no apparent peak was observed in the absorption spectrum at the range of 206-214 nm. Therefore, we showed the total ion current (TIC) with the absorption spectrum.

Figure S2

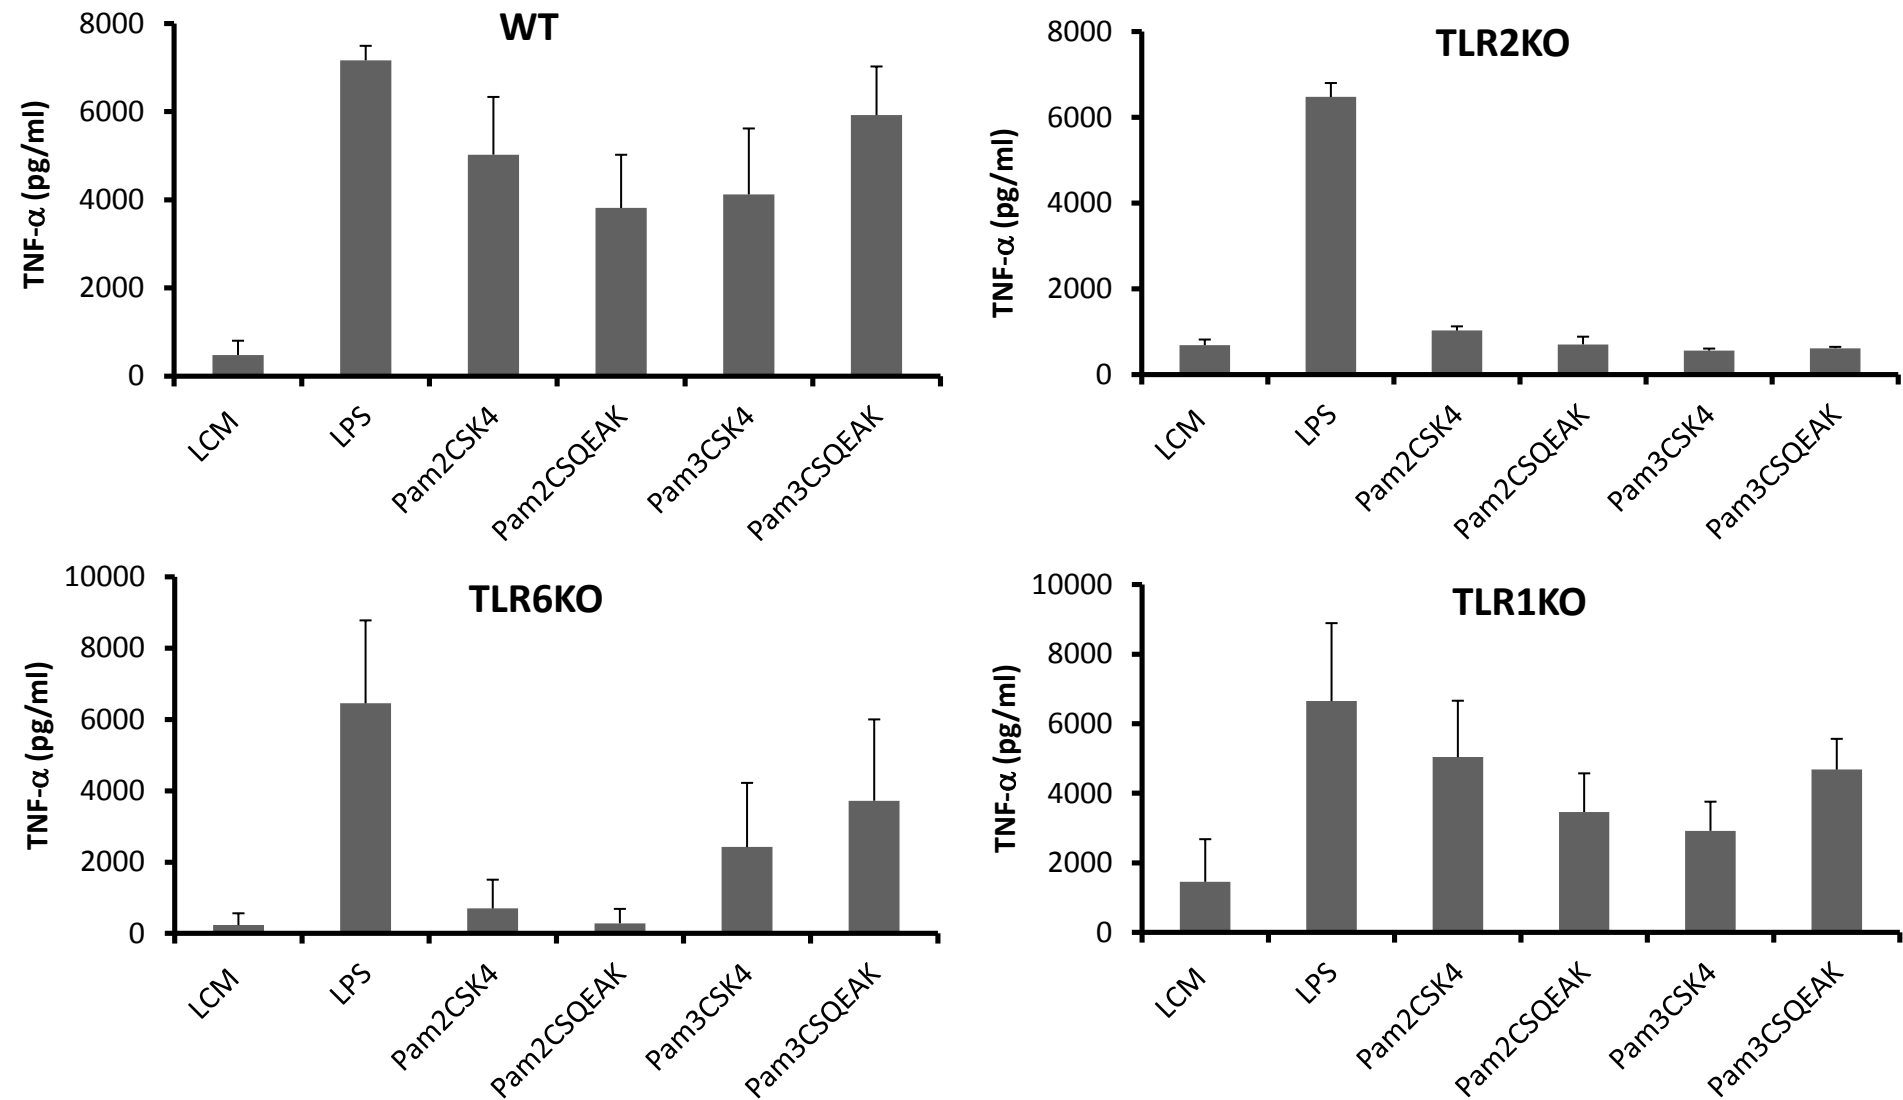

**Supplemental Figure 2.** The responses of BM-DCs after stimulation with lipitated peptide. BM-DCs were generated from wild-type (WT), TLR1<sup>-/-</sup> (TLR1 KO), TLR2<sup>-/-</sup> (TLR2 KO), or TLR6<sup>-/-</sup> (TLR6 KO) mice. BM-DCs were stimulated with indicated lipopeptide (10  $\mu$ g/ml) or LPS (0.1  $\mu$ g/ml) for 24 h. The levels of TNF- $\alpha$  in the culture supernatant were measured by ELISA. LPS (TLR4 agonist), was used as positive control. LCM (complete RPMI-10 medium) was used as negative control. The results are expressed as the means + S.D. of the amount of cytokine.

**Supplemental Materials and Methods.** One microliter of the polished tryptic fragments was mixed with 1  $\mu$ l of a saturated solution of  $\alpha$ -cyano-4-hydroxycinnamic acid in acetonitrile/0.1% trifluoroacetic acid (1:3, vol/vol). One microliter of the mixture was placed on the target plate of a MALDI micro MX mass spectrometer (Waters, Manchester, UK) for analysis.

3  $\mu$ g of purified lipopeptides were loaded onto the Agilent 1100 series HPLC equipped with a 2.1x 100 mm POROS R1/10 column (Applied Biosystems®). The mobile phase A consisted of 0.1% formic acid in Milli-Q water and mobile phase B consisted of 0.1% formic acid in 100% CAN. a linear gradient was started from 5% to 100% B over a 20-min period and continued for 5 min at 100% B. After additional washing with 100% B for 5 min. Then, a steady gradient was washed with 20% B and 80% Isopropanol for 20 min. Later, we used 100% Isopropanol for additional washing, and change the buffer to 100% B. Finally, the buffer system was in 5% A and 95% B in 10 min.

**Supplemental Materials and Methods.** These lipopeptides were purchased from GeneDireX (Nevada, USA). These compounds are mixture of R and S stereoisomer. The stereochemistry of the compounds are: N-Palmitoyl-S-[2,3-bis(palmitoyloxy)-(2RS)-propyl]-[R]-cysteiny-[S]-seryl-[S]-glutaminy-[S]-glutamyl-[S]-alanyl-[S]-lysine (Pam3CSQEAK) and S-[2,3-bis(palmitoyloxy)-(2RS)-propyl]-[R]-cysteiny-[S]-seryl-[S]-glutaminy-[S]-glutamyl-[S]-alanyl-[S]-lysine (Pam2CSQEAK).

BM-DCs were generated from wild-type (WT), TLR1<sup>-/-</sup> (TLR1 KO), TLR2<sup>-/-</sup> (TLR2 KO), or TLR6<sup>-/-</sup> (TLR6 KO) mice as described in the manuscript. The cultured BM-DCs (1 x 10<sup>6</sup>/ml complete RPMI-10 medium) were stimulated with indicated lipopeptides (10 µg/ml) or LPS (0.1 µg/ml) for 24 h. The levels of TNF- $\alpha$  in the culture supernatant were measured by ELISA. LPS (TLR4 agonist), was used as positive control. LCM (complete RPMI-10 medium) was used as negative control. The results are expressed as the means + S.D. of the amount of cytokine.
